# Supplementary material for: Prevalence and Molecular Characteristics of FAdV-4 from Indigenous Chicken Breeds in Yunnan Province, Southwestern China
Source: MDPI journal article supplement (doi:10.3390/microorganisms11112631), 2023-10-26
Supplement: s1 [file s1]

**Table S2.** Details of fowl adenovirus isolates for sequence alignment and phylogenetic analysis

| Species            | Accession no | Name of strains        | origin      | date of collection |
|--------------------|--------------|------------------------|-------------|--------------------|
| Fowl adenovirus A  | MF168407.1   | JM1/1                  | Japan       | Nov-00             |
|                    | NC_001720.1  | VR-432                 | Phelps      | Jan-96             |
| Fowl adenovirus B  | NC_021221.1  | FAdV5-340              | Ireland     | Early 1970s        |
|                    | OK283055.1   | 19/7209                | Hungary     | 2019               |
| Fowl adenovirus C. | KT717889.1   | C-2B                   | USA         | Sep-15             |
|                    | KU877435.1   | SDSX-15                | China       | 20-MAR-2016        |
|                    | KU877420.1   | HBLF-15                | China       | 20-MAR-2016        |
|                    | KU877419.1   | SDFC2-15               | China       | 20-MAR-2016        |
|                    | KX364100.1   | SDTW2-16               | China       | 03-APR-2017        |
|                    | MK875249.1   | CH/GDHZ-S7/2017        | China       | 24-NOV-2019        |
|                    | MK875247.1   | CH/GDBL-S2/2017        | China       | 24-NOV-2019        |
|                    | KU877436.1   | SDBZ-15                | China       | 20-MAR-2016        |
|                    | KU877427.1   | SDXT4-15               | China       | 20-MAR-2016        |
|                    | KU877426.1   | SDDM-15                | China       | 20-MAR-2016        |
|                    | KU877416.1   | SDSK-15                | China       | 20-MAR-2016        |
|                    | KU877432.1   | SDXT2-15               | China       | 20-MAR-2016        |
|                    | KU877422.1   | SDXT8-15               | China       | 20-MAR-2016        |
|                    | KU877417.1   | SDZB-15                | China       | 20-MAR-2016        |
|                    | KU877434.1   | SDJN1-15               | China       | 20-MAR-2016        |
|                    | KU877429.1   | SDXT3-15               | China       | 20-MAR-2016        |
|                    | KU877421.1   | SDJN2-15               | China       | 20-MAR-2016        |
|                    | KU877415.1   | SDFC4-15               | China       | 20-MAR-2016        |
|                    | OP917885.1   | SDRZ-21072101          | China       | 16-JAN-2023        |
|                    | MZ435838.1   | CH/JSXZ/1905           | China       | 19-OCT-2022        |
|                    | KU647684.1   | CG-G                   | China       | 08-AUG-2016        |
|                    | MG148335.1   | CH/AHMC/2015           | China       | 09-SEP-2018        |
|                    | ON929900.1   | SDLY                   | China       | 12-OCT-2022        |
|                    | ON652872.1   | Pasouk                 | Astrulian   | 08-SEP-2022        |
|                    | AJ459805.1   | Indian                 | Indian      | 15-APR-2005        |
|                    | EU931692.1   | PJ-06                  | Indian      | 02-SEP-2008        |
|                    | KT717889.1   | C-2B                   | USA         | 04-AUG-2021        |
|                    | KU175344.1   | FAdV/PA/Layer/27614/13 | USA         | 02-MAY-2016        |
|                    | HQ709227.1   | Kr-Gunwi               | South Korea | 21-FEB-2017        |
|                    | GU188428.1   | ON1                    | Canada      | 26-MAY-2011        |
|                    | KP295475.1   | MX-SHP95               | Mexico      | 29-JUN-2015        |
|                    | KU981155.1   | FAdV-HBSJZ-14094-O     | China       | 31-MAR-2017        |
|                    | KU981155.1   | FAdV-HBSJZ-14094-O     | China       | 31-MAR-2017        |
|                    |              | YNBJ-5/202305          | China       | 2023               |
|                    |              | YNBL-8/202303          | China       | 2023               |
|                    |              | YNBJ-5/202305          | China       | 2023               |

|                   |             |                   |          |              |
|-------------------|-------------|-------------------|----------|--------------|
|                   |             | YNBL-47/202303    | China    | 2023         |
|                   |             | YNFD-202211       | China    | 2022         |
|                   |             | YNJC-202212       | China    | 2022         |
|                   |             | YNLP-202208       | China    | 2022         |
|                   |             | YNNJ-202207       | China    | 2022         |
|                   |             | YNXJ-202210       | China    | 2022         |
|                   |             | YNYL-202205       | China    | 2022         |
|                   |             | YN-NC1/202203     | China    | 2022         |
|                   |             |                   |          |              |
|                   | KU746335.1  | MX95-S11          | Mexico   | January-1995 |
| Fowl adenovirus D | AC_000013.1 | Fowl adenovirus D | unknown  | 2018         |
|                   |             |                   |          |              |
|                   | JN112373.1  | 764               | Canada   | Dec-09       |
|                   | KX077988.1  | HLJ/151129        | China    | 2015         |
| Fowl adenovirus E | KU517714.1  | UPM04217          | Malaysia | Dec-09       |

---
