# Supplementary material for: Prevalence and Molecular Characteristics of FAdV-4 from Indigenous Chicken Breeds in Yunnan Province, Southwestern China
Source: MDPI journal article supplement (doi:10.3390/microorganisms11112631), 2023-10-26
Supplement: s1 [file s1]

**Table S3**Information on strains with the highest homology to FAdV in Southwest China.

| Isolate       | Similarity with other Chinese isolates at the Nucleotide level |              |                |              | Similarity with other Chinese isolates at the Nucleotide level |              |                |              |
|---------------|----------------------------------------------------------------|--------------|----------------|--------------|----------------------------------------------------------------|--------------|----------------|--------------|
|               | Strain                                                         | Accession no | Similarity (%) | Location     | Strain                                                         | Accession no | Similarity (%) | Location     |
| YNBL-8/202303 | GDMZ                                                           | MG856954.1   | 99.72          | Guangdong    | ZJ2015                                                         | MF521611.1   | 99.72          | Zhejiang     |
|               | ZZ                                                             | MN337322.1   | 99.72          | Henan        | GDYF                                                           | MK387062.1   | 99.72          | Guangdong    |
|               | SCDY                                                           | MK629523.1   | 99.72          | Sichuan      | SD16101/FAdV-4                                                 | MH006602.1   | 99.72          | Shandong     |
|               | GX-1                                                           | MH454598.1   | 99.72          | Guangxi      | CH/AHMC/2015                                                   | MG148335.1   | 99.72          | AnHui        |
| YNBJ-5/202305 | GDMZ                                                           | MG856954.1   | 99.86          | Guangdong    | HLJDA15                                                        | KX538980.1   | 99.86          | Heilongjiang |
|               | ZZ                                                             | MN337322.1   | 99.86          | Henan        | GX-1                                                           | MH454598.1   | 99.86          | Guangxi      |
|               | SCDY                                                           | MK629523.1   | 99.86          | Sichuan      | SD16101/FAdV-4                                                 | MH006602.1   | 99.86          | ShanDong     |
|               | GDYF                                                           | MK387062.1   | 99.86          | Guangdong    |                                                                |              |                |              |
| YNBL-7/202303 | GDMZ                                                           | MG856954.1   | 99.72          | Guangdong    | GX2020-019                                                     | OP378126.1   | 99.72          | Guangxi      |
|               | SCDY                                                           | MK629523.1   | 99.72          | Sichuan      | SD1601/FAdV-4                                                  | MH006602.1   | 99.72          | ShanDong     |
|               | AH712                                                          | KY436522.1   | 99.72          | Anhui        | HeBei/0715/2021                                                | OP223055.1   | 99.72          | HeBei        |
|               | HLJDA15                                                        | KX538980.1   | 99.72          | Heilongjiang |                                                                |              |                |              |
| YNFD/202211   | GDMZ                                                           | MG856954.1   | 99.90          | Guangdong    | CH/JSXZ/2015                                                   | KU569296.1   | 99.90          | Jiangsu      |
|               | SCDY                                                           | MK629523.1   | 99.90          | Sichuan      | HLJ/160826                                                     | KY569422.1   | 99.90          | HeiLongjiang |
|               | AH712                                                          | KY436522.1   | 99.90          | Anhui        |                                                                |              |                |              |
|               | SD1511                                                         | MF496037.1   | 99.90          | Shandong     |                                                                |              |                |              |
| YNJC/202212   | GDMZ                                                           | MG856954.1   | 100.00         | Guangdong    | CH/GDYF/201706                                                 | MK387062.1   | 100.00         | GuangDong    |
|               | SCDY                                                           | MK629523.1   | 100.00         | Sichuan      | AH712                                                          | KY436522.1   | 100.00         | AnHui        |
|               | CH/JSXZ/2015                                                   | KU569296.1   | 100.00         | Jiangsu      |                                                                |              |                |              |
|               | GX2017-01                                                      | MN577977.1   | 100.00         | Guangxi      |                                                                |              |                |              |
| YNLP/202208   | GDMZ                                                           | MG856954.1   | 99.82          | Guangdong    | PDS                                                            | KU647685.1   | 99.82          | Henan        |
|               | SCDY                                                           | MK629523.1   | 99.82          | Sichuan      | CH/AHMC/2015                                                   | MG148335.1   | 99.82          | AnHui        |
|               | HLJ/151118                                                     | KX061750.1   | 99.82          | Heilongjiang | CH/GDYF/201706                                                 | MK387062.1   | 99.82          | GuangDong    |
|               | AH712                                                          | KY436522.1   | 99.82          | Anhui        |                                                                |              |                |              |
| YN-NC1/202203 | GDMZ                                                           | MG856954.1   | 99.97          | Guangdong    | HeBei/0914/2021                                                | OP223053.1   | 99.97          | Hebei        |
|               | SCDY                                                           | MK629523.1   | 99.97          | Sichuan      | CH/GDYF/201706                                                 | MK387062.1   | 99.97          | GuangDong    |
|               | AH712                                                          | KY436522.1   | 99.97          | Anhui        | CH/AHMC/2015                                                   | MG148335.1   | 99.97          | AnHui        |
|               | GX2020-019                                                     | OP378126.1   | 99.97          | Guangxi      |                                                                |              |                |              |
| YNNJ/202207   | GDMZ                                                           | MG856954.1   | 99.90          | Guangdong    | GX2020-019                                                     | OP378126.1   | 99.90          | Guangxi      |
|               | SCDY                                                           | MK629523.1   | 99.90          | Sichuan      | CH/GDYF/201706                                                 | MK387062.1   | 99.90          | GuangDong    |
|               | AH712                                                          | KY436522.1   | 99.90          | Anhui        | CH/AHMC/2015                                                   | MG148335.1   | 99.90          | AnHui        |
|               | HLJDA15                                                        | KX538980.1   | 99.90          | Heilongjiang |                                                                |              |                |              |
| YNXJ/202210   | GDMZ                                                           | MG856954.1   | 99.89          | Guangdong    | HeBei/0914/2021                                                | OP223053.1   | 99.89          | Hebei        |
|               | SCDY                                                           | MK629523.1   | 99.89          | Sichuan      | CH/GDYF/201706                                                 | MK387062.1   | 99.89          | GuangDong    |
|               | AH712                                                          | KY436522.1   | 99.89          | Anhui        | CH/AHMC/2015                                                   | MG148335.1   | 99.89          | AnHui        |
|               | HLJFA15                                                        | KU991797.1   | 99.89          | Heilongjiang | PDS                                                            | KU647685.1   | 99.89          | HeNan        |
| YNYL/202205   | GDMZ                                                           | MG856954.1   | 99.93          | Guangdong    | SDSX1                                                          | KU845700.1   | 99.93          | Shandong     |

|            |            |       |              |                |            |       |           |
|------------|------------|-------|--------------|----------------|------------|-------|-----------|
| SCDY       | MK629523.1 | 99.93 | Sichuan      | CH/GDYF/201706 | MK387062.1 | 99.93 | GuangDong |
| AH712      | KY436522.1 | 99.93 | Anhui        | CH/AHMC/2015   | MG148335.1 | 99.93 | AnHui     |
| HLJ/160826 | KY569422.1 | 99.93 | Heilongjiang |                |            |       |           |

---
