# Supplementary material for: Prevalence and Molecular Characteristics of FAdV-4 from Indigenous Chicken Breeds in Yunnan Province, Southwestern China
Source: MDPI journal article supplement (doi:10.3390/microorganisms11112631), 2023-10-26
Supplement: s1 [file s1]

**Table S1.** Primers used to amplify the capsid protein sequence of FAdV strains

| PCR product | Sequences of primers                                                                                                                                               | Products size      | Reference |
|-------------|--------------------------------------------------------------------------------------------------------------------------------------------------------------------|--------------------|-----------|
| FAdV-JD     | FAdV-JD-F:<br>CAAGTTCAGACAGACGGT<br>FAdV-JD-R:<br>AGTGATGACGGGACATCAT                                                                                              | 889 bp             |           |
| Hexon       | Hexon-F1: CGTCTAGGTTCGCACCGCCATGGC<br>Hexon-R1: CATCTGGTCGATGGACCAACGCGCACC<br>Hexon-F2:<br>CATCGACCAGATGGACAACGTCAACCCCTTCAAC<br>Hexon-R2: TTACACGGCGTTGCCTGTGGCG | 1501 bp<br>1345 bp | [1]       |
| Fiber       | C-Fib1-F: AGATCTATGTCGGCCCTAATC<br>C-Fib1-R: AAGCTTTTAGGGGCTCGGAGC<br>C-Fib2-F: AGATCGATGCTCCGAGCCCCTAA<br>C-Fib2-R: CGGCCGTTACGGGAGGGAGCCC                        | 1287 bp<br>1426 bp | [2]       |
| Penton      | C-Penton-F:<br>GGATCCATGTGGGGGTTGCAGCCGCCGACGT<br>C-Penton-R:<br>CTCGAGCTACTGCAAGGTCGCGGAACCTCAGA                                                                  | 1577 bp            |           |

1. Chen, L.; Yin, L.; Zhou, Q.; Peng, P.; Du, Y.; Liu, L.; Zhang, Y.; Xue, C.; Cao, Y. Epidemiological investigation of fowl adenovirus infections in poultry in China during 2015-2018. *BMC veterinary research* **2019**, *15*, 271, doi:10.1186/s12917-019-1969-7.
2. Marek, A.; Nolte, V.; Schachner, A.; Berger, E.; Schlötterer, C.; Hess, M. Two fiber genes of nearly equal lengths are a common and distinctive feature of Fowl adenovirus C members. *Veterinary microbiology* **2012**, *156*, 411-417, doi:10.1016/j.vetmic.2011.11.003.
